# Supplementary material for: Probability Fluxes and Transition Paths in a Markovian Model Describing Complex Subunit Cooperativity in HCN2 Channels
Source: PLoS Comput Biol. 2012 Oct 18;8(10):e1002721. doi: 10.1371/journal.pcbi.1002721 (PMC3475657; doi:10.1371/journal.pcbi.1002721)
Supplement: Table S1 — Rate constants for the C4L-O4L model. The rate constants were computed by the global fit as described [22]. (DOC) [file pcbi.1002721.s001.doc]

Supporting Information

**Probability fluxes and transition paths in a Markovian model describing complex subunit cooperativity in HCN2 channels**

# Klaus Benndorf, Jana Kusch, Eckhard Schulz

Supporting Tables

**Table S1.** Rate constants for the C4L-O4L model.

| Parameter | Dimension | Value | s.e.m. | s.e.m. (%) |
| --- | --- | --- | --- | --- |
| *k*C0C1 | s-1M-1 | 5.4x106 | 4.2x105 | 7.78 |
| *k*C1C0 | s-1 | 3.7x100 | 3.1x10-1 | 8.38 |
| *k*C1C2 | s-1M-1 | 8.4x105 | 3.9x104 | 4.64 |
| *k*C2C1 | s-1 | 9.3x10-2 | 4.3x10-3 | 4.62 |
| *k*C2C3 | s-1M-1 | 9.9x104 | 1.6x103 | 1.62 |
| *k*C3C2 | s-1 | 8.5x100 | 5.2x10-1 | 6.12 |
| *k*C3C4 | s-1M-1 | 2.2x107 | 3.2x106 | 14.6 |
| *k*C4C3 | s-1 | 8.5x100 | 5.2x10-1 | 6.12 |
|  |  |  |  |  |
| *k*O0O1 | s-1M-1 | 8.4x106 | 5.4x105 | 6.43 |
| *k*O1O0 | s-1 | 2.5x100 | 1.7x10-1 | 6.80 |
| *k*O1O2 | s-1M-1 | 1.4x106 | 3.6x104 | 2.57 |
| *k*O2O1 | s-1 | 1.5x10-1 | 1.5x10-3 | 1.00 |
| *k*O2O3 | s-1M-1 | 1.0x106 | 9.2x104 | 9.20 |
| *k*O3O2 | s-1 | 4.6x100 | 3.6x10-1 | 7.83 |
| *k*O3O4 | s-1M-1 | 2.2x107 | 3.2x106 | 14.6 |
| *k*O4O3 | s-1 | 8.5x100 | 5.2x10-1 | 6.12 |
|  |  |  |  |  |
| *k*O0C0 | s-1 | 3.0x10-2 | 2.7 x10-3 | 9.00 |
| *k*C0O0 | s-1 | 4.0x10-2 | 3.6 x10-3 | 9.00 |
| *k*O1C1 | s-1 | 7.1x10-1 | 6.2 x10-2 | 8.73 |
| *k*C1O1 | s-1 | 2.2x100 | 1.8 x10-1 | 8.18 |
| *k*O2C2 | s-1 | 4.6x10-3 | 1.6 x10-3 | 34.9 |
| *k*C2O2 | s-1 | 1.5x10-2 | 5.4 x10-3 | 36.0 |
| *k*O3C3 | s-1 | >3x10-1→ 3x100 |  |  |
| *k*C3O3 | s-1 | >2x101→ 2x102 |  |  |
| *k*O4C4 | s-1 | >3x10-1→ 3x100 |  |  |
| *K*C4O4 | s-1 | >2x101→ 2x102 |  |  |

The rate constants were computed by the global fit as described ]. *k*O3C3=*k*O4C4 was not determined by the fit, however, a lower border of 0.3 s-1 was determined by a 10% increase of **2. For the computations herein we used ten times this value, 3 s-1, resulting in *k*C3O3=*k*C4O4=2.0102 s-1.
